# Supplementary material
Source: MDPI journal article supplement (https://www.mdpi.com/2311-5637/9/10/886)
Supplement: s1 [file s1]

Archive with 3 entries (3 files):
- Supplementary Fig-1.jpg
- Supplementary Fig. S1.pdf
- Table S1 Strains and plasmids used in this study.pdf
