# Supplementary material
Source: MDPI journal article supplement (https://www.mdpi.com/2311-5637/9/10/886)
Supplement: s1 [file s1]

## Supplementary Figure S1

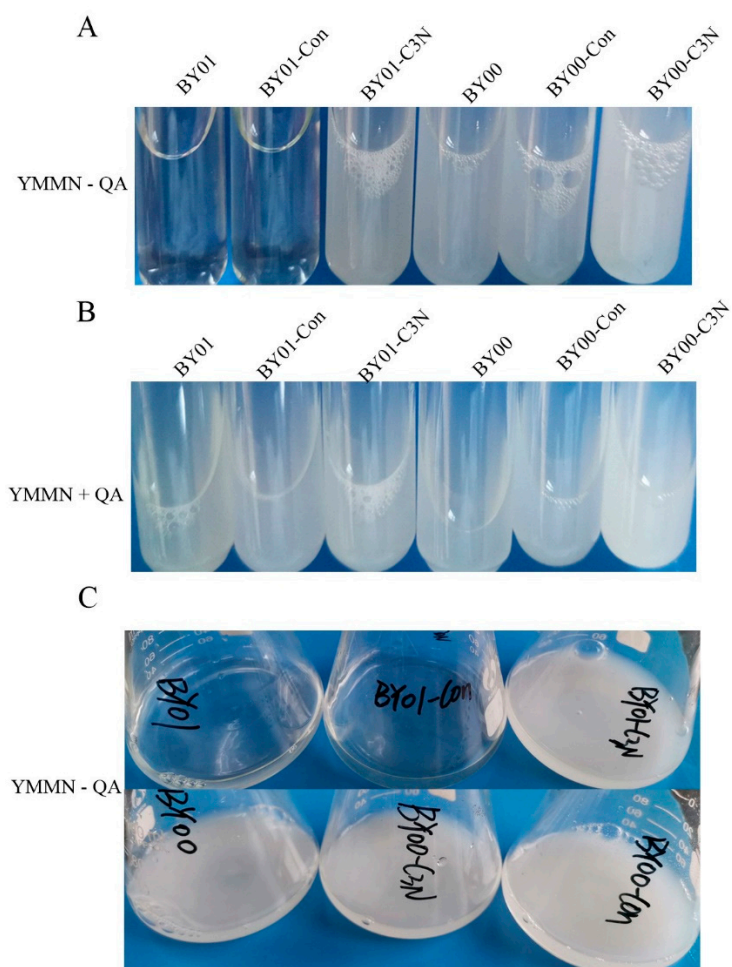

**Figure S1** The growth phenotypes of different engineered *S. cerevisiae* in YMMN medium. (A) The *S. cerevisiae* strains growth in YMMN medium without QA (YMMN-QA) in test tubes; (B) The *S. cerevisiae* strains growth in YMMN medium with 10 mM QA (YMMN + QA) in test tubes; and (C) The *S. cerevisiae* strains growth in YMMN medium without QA in flask. The phenotypes of the six strains were BY00 (wild type), BY00-Con (wild type with empty vector), BY00-C3N (wild type with the redesigned C3N pathway), BY01 ( $\Delta BNA2$  mutant), BY01-Con ( $\Delta BNA2$  mutant with empty vector) and BY01-C3N ( $\Delta BNA2$  mutant with the redesigned C3N pathway), and the strains were growth at 30 °C for 36 h with 20 g/L glucose as carbon source.
