# Supplementary material
Source: MDPI journal article supplement (https://www.mdpi.com/2311-5637/9/10/886)
Supplement: s1 [file s1]

**Table S1 Strains and plasmids used in this study**

| Strains                           | Genotype and description                                                                                                                                                                       | Reference   |
|-----------------------------------|------------------------------------------------------------------------------------------------------------------------------------------------------------------------------------------------|-------------|
| <b><i>Escherichia coli</i></b>    |                                                                                                                                                                                                |             |
| <i>E. coli</i> JM109              | <i>recA1, endA1, gyrA96, thi-1, hsdR17, supE44, relA1, Δ(lac-proAB)/F' [traD36, proAB<sup>+</sup>, lacIq, lacIq lacZΔM15]</i>                                                                  | Lab storage |
| <b><i>S. cerevisiae</i></b>       |                                                                                                                                                                                                |             |
| BY00                              | Wild <i>Saccharomyces cerevisiae</i> BY4741 (MATa <i>his3Δ1 leu2Δ0 met15Δ0 ura3Δ0</i> )                                                                                                        | [38]        |
| BY01                              | BY00 <i>BNA2Δ::T<sub>ADHI</sub>-P<sub>GALI</sub>-P<sub>GALI</sub>-T<sub>CYCI</sub></i>                                                                                                         | This study  |
| BY00-Con                          | BY00 containing plasmid pYES2.0                                                                                                                                                                | This study  |
| BY01-Con                          | BY01 containing plasmid pYES2.0                                                                                                                                                                | This study  |
| BY00- <i>phzD</i>                 | BY00 containing plasmid pYE- <i>P<sub>TEFI</sub>-phzD</i>                                                                                                                                      | This study  |
| BY00- <i>phzE</i>                 | BY00 containing plasmid pYE- <i>P<sub>TEFI</sub>-phzE</i>                                                                                                                                      | This study  |
| BY00- <i>dhbX</i>                 | BY00 containing plasmid pYE- <i>P<sub>TEFI</sub>-dhbX</i>                                                                                                                                      | This study  |
| BY01-C3N                          | BY01 containing plasmid pY-C3N                                                                                                                                                                 | This study  |
| BY00-C3N                          | BY00 containing plasmid pY-C3N                                                                                                                                                                 | This study  |
| <b>Plasmids</b>                   |                                                                                                                                                                                                |             |
| pYES2.0                           | 2μ, Shuttle vector of <i>Escherichia coli</i> and <i>Saccharomyces cerevisiae</i> , Amp <sup>R</sup> , <i>URA3</i> marker                                                                      | Lab storage |
| pYE2.0- <i>phzD</i>               | 2μ plasmid, <i>URA3</i> marker, <i>P<sub>GALI</sub>-phzD-T<sub>CYCI</sub></i>                                                                                                                  | This study  |
| pYE2.0- <i>phzE</i>               | 2μ plasmid, <i>URA3</i> marker, <i>P<sub>GALI</sub>-phzE-T<sub>CYCI</sub></i>                                                                                                                  | This study  |
| pYE2.0- <i>dhbX</i>               | 2μ plasmid, <i>URA3</i> marker, <i>P<sub>GALI</sub>-dhbX-T<sub>CYCI</sub></i>                                                                                                                  | This study  |
| pYE- <i>P<sub>TEFI</sub>-phzD</i> | 2μ plasmid, <i>URA3</i> marker, <i>P<sub>TEFI</sub>-phzD-T<sub>CYCI</sub></i>                                                                                                                  | This study  |
| pYE- <i>P<sub>TEFI</sub>-phzE</i> | 2μ plasmid, <i>URA3</i> marker, <i>P<sub>TEFI</sub>-phzE-T<sub>CYCI</sub></i>                                                                                                                  | This study  |
| pYE- <i>P<sub>TEFI</sub>-dhbX</i> | 2μ plasmid, <i>URA3</i> marker, <i>P<sub>TEFI</sub>-dhbX-T<sub>CYCI</sub></i>                                                                                                                  | This study  |
| pY-C3N                            | 2μ plasmid, <i>URA3</i> marker, including module <i>P<sub>TEFI</sub>-phzE-T<sub>CYCI</sub></i> ; <i>P<sub>PGK1</sub>-phzD-T<sub>TDHI</sub></i> ; <i>P<sub>TEFI</sub>-dhbX-T<sub>CYCI</sub></i> | This study  |
| pUMRI-21 (A)                      | Plasmid containing loxP- <i>kanMX-URA3</i> -loxP deletion cassette, Kan <sup>R</sup> , pBR322 ori                                                                                              | [39]        |
| pRU-BNA-UD                        | pUMRI-21 (A) containing the loxP- <i>kanMX-URA3</i> -loxP deletion cassette flanked by 500 bp of up and down fragment to inactivate gene <i>BNA2</i>                                           | This study  |

Amp<sup>R</sup>: ampicillin resistance; Kan<sup>R</sup>: kanamycin resistance
