# Supplementary material
Source: MDPI journal article supplement (https://www.mdpi.com/2311-5637/9/10/886)

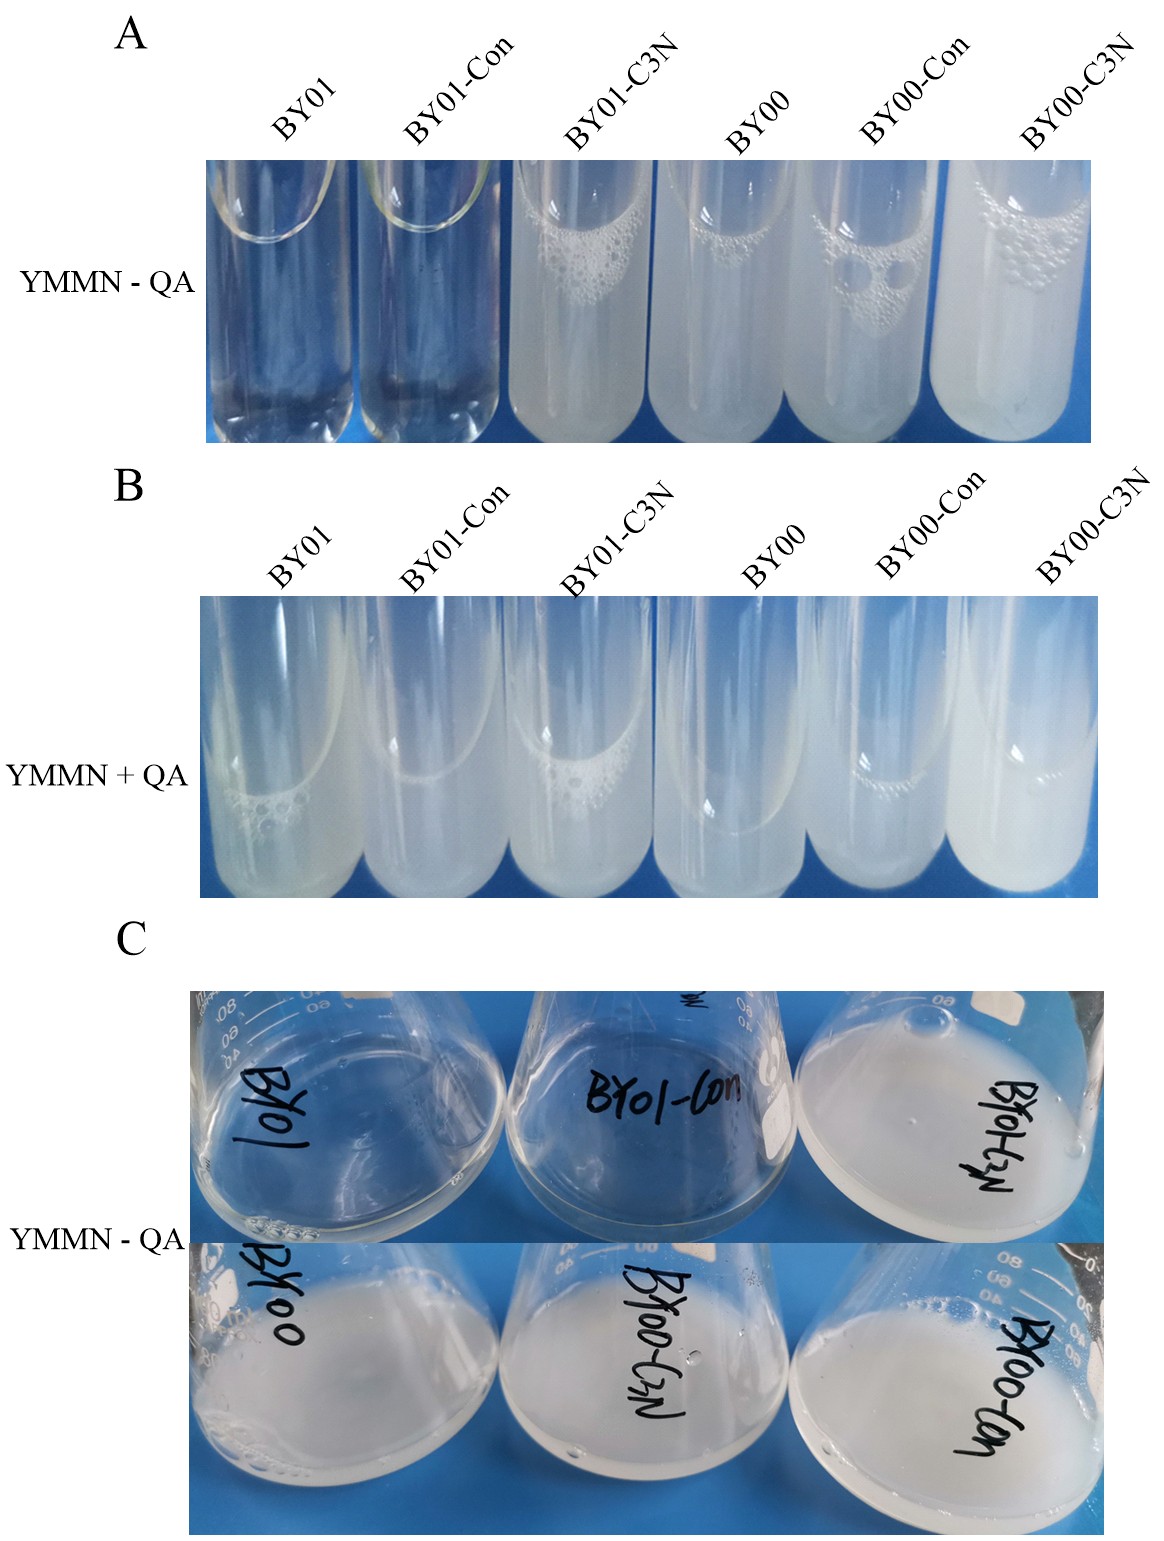

Supplement: s1 [file s1 › Supplementary Fig-1.jpg]
